# Supplementary material for: CCL2 mobilizes ALIX to facilitate Gag-p6 mediated HIV-1 virion release
Source: eLife. 2019 Jun 7;8:e35546. doi: 10.7554/eLife.35546 (PMC6592687; doi:10.7554/eLife.35546)
Supplement: Figure 4—figure supplement 2—source data 1. [file elife-35546-fig4-figsupp2-data1.xlsx]

## Sheet: Sheet1
Figure 4–figure supplement 2-source data: Relative ight units (from Luciferase assays) plotted in Figure 4–figure supplement 2
Samples	Ave RLU	Ave RLU	Ave RLU	Ave RLU
Mock NT	22200	25845	21359	26318
Mock CCL2	21450	23658	24042	20801
Mock a-CCL2	17957	22389	15850	20031
Mock Isotype	20228	16990	18008	21486
HIV-1B wt NT	566044	574557	573247	567682
HIV-1B wt CCL2	558416	566786	558142	564527
HIV-1B wt a-CCL2	578916	574069	582334	583149
HIV-1B wt Isotype	568275	580134	572679	581372
HIV-1B(-PTAP) NT	180737	185827	178267	180461
HIV-1B(-PTAP) CCL2	177880	181485	172369	181802
HIV-1B(-PTAP) a-CCL2	161655	175150	176549	177794
HIV-1B(-PTAP) isotype	170691	184772	161680	172780
HIV-1B(-LY) NT	374166	380791	371145	379602
HIV-1B(-LY) CCL2	369676	379574	365592	374641
HIV-1B(-LY) a-CCL2	376724	314203	382362	378348
HIV-1B(-LY) isotype	391057	383655	374820	374309
HIV-1B(-PTAP/-LY) NT	83137	85114	80677	88465
HIV-1B(-PTAP/-LY) CCL2	81583	82867	72452	84447
HIV-1B(-PTAP/-LY) a-CCL2	101442	96204	86854	99304
HIV-1B(-PTAP/-LY) isotype	90287	88037	86073	89225
HIV-1C wt NT	498085	401478	495940	499702
HIV-1C wt CCL2	497702	496907	493576	498722
HIV-1C wt a-CCL2	495058	488806	499136	496805
HIV-1C wt Isotype	418346	480096	467555	480634
HIV-1C (-PTAP) NT	72424	70243	66080	69447
HIV-1C (-PTAP) CCL2	72013	76392	65538	70385
HIV-1C (-PTAP) a-CCL2	84071	93357	76733	77923
HIV-1C (-PTAP) isotype	75146	80359	72920	76006
HIV-1C(+LY) NT	476706	480483	486570	490528
HIV-1C(+LY) CCL2	480446	484784	477721	477081
HIV-1C(+LY) a-CCL2	483594	487172	500248	493053
HIV-1C(+LY) isotype	486337	488494	482224	476647
HIV-1C(+LY/-PTAP) NT	83404	89381	81404	88316
HIV-1C(+LY/-PTAP) CCL2	84415	91339	85375	84343
HIV-1C(+LY/-PTAP) a-CCL2	81596	87121	85705	85824
HIV-1C(+LY/-PTAP) Isotype	89734	85429	76332	79761
